# Supplementary figures and images for: Gd3Ni2 and Gd3CoxNi2−x: magnetism and unexpected Co/Ni crystallographic ordering
Source: Royal Society of Chemistry journal article supplement (doi:10.1039/c6tc01035k), 2016-01-01

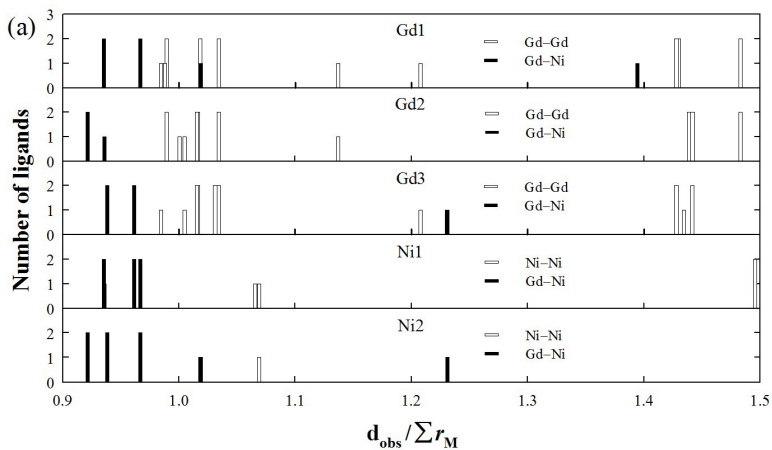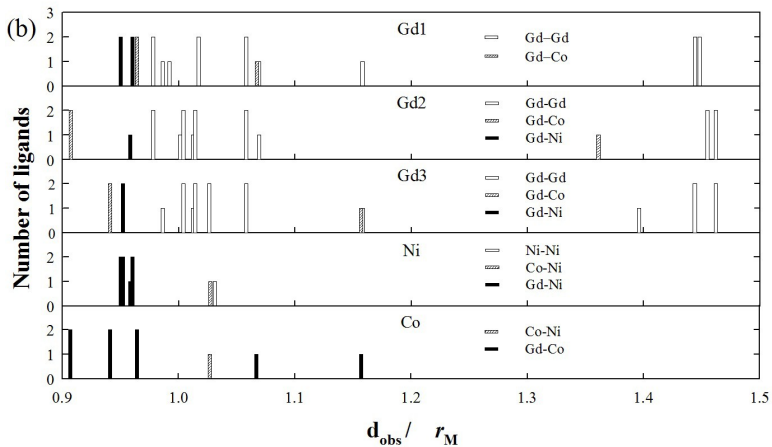

Supplement: c6tc01035k4.pdf [file c6tc01035k4.pdf]

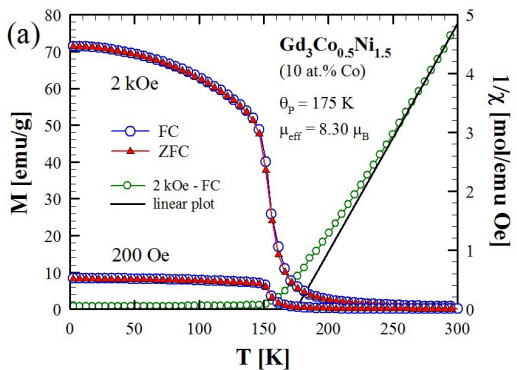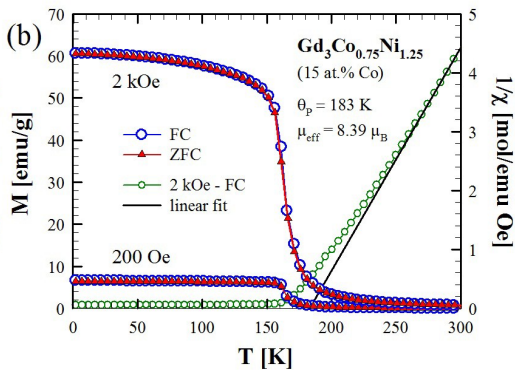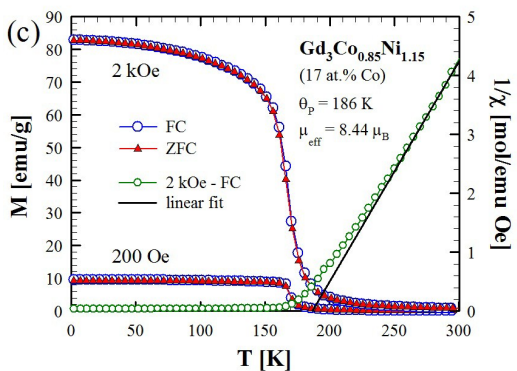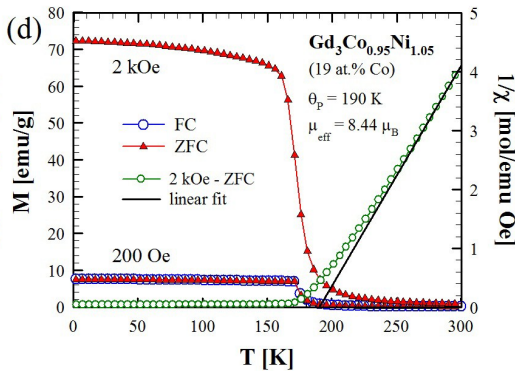

Supplement: c6tc01035k5.pdf [file c6tc01035k5.pdf]
